1 For consideration as a Short Communication:

2

3 **Insights on the importance of salinity from the first cultured freshwater SAR11**  
4 **(LD12) representative**

5

6 Michael W. Henson<sup>1</sup>, V. Celeste Lanclos<sup>1</sup>, and J. Cameron Thrash<sup>1,2</sup>

7

8 1. Department of Biological Sciences, Louisiana State University, Baton Rouge, LA,  
9 70806, U.S.A.

10

11 2. Correspondence:

12

13 J. Cameron Thrash

14 Louisiana State University

15 Department of Biological Sciences

16 202 Life Sciences Bldg.

17 Baton Rouge, LA 70803

18 Phone: 225-578-8210

19 Fax: 225-578-2597

20 thrashc@lsu.edu

21

22

23

24

25

26

27

28

29

30

31 Running title: Cultivation of the first LD12 SAR11

32

33 **Conflict of Interest Statement.** The authors declare no competing financial interests in  
34 relation to the work described.

35

36 This work was supported by the Department of Biological Sciences at Louisiana State  
37 University and the Louisiana Board of Regents (grant LEQSF(2014-17)-RD-A-06).

38

39 **Abstract**

40 Bacterioplankton of the SAR11 clade dominate aquatic ecosystems but  
41 knowledge of their freshwater members remains limited due to a lack of cultured  
42 representatives. Here, we report the first isolate from the freshwater SAR11 subclade  
43 IIIb, a.k.a. LD12, obtained from surface waters in Lake Borgne, a lagoon on the  
44 southeastern coast of Louisiana. Consistent with pervasive ecological data, strain  
45 LSUCC0530 is highly restricted to growth at low salinities. Comparison of its distribution  
46 with the sister clade subclade IIIa, however, suggests that niche differentiation between  
47 sister taxa in coastal environments may be driven by more than salinity alone.

48

49 **Introduction**

50 While many environmental conditions (e.g. nutrients, temperature, pH) play an  
51 important role in structuring microbial assemblages, salinity remains one of the most  
52 important factors affecting microbial community membership (Lozupone and Knight,  
53 2007). This reflects the fact that evolutionary transitions between marine and freshwater  
54 environments occur rarely among members of a given phylogenetic group (Logares *et*  
55 *al.*, 2009). SAR11 is the most abundant prokaryotic marine clade, with an estimated  
56 global population size of  $\sim 10^{28}$  cells, and can constitute over 25% of the  
57 bacterioplankton in a given community (Schattenhofer, 2009; Morris *et al.*, 2002). The  
58 SAR11 clade, family *Pelagibacterales*, contains multiple subclades that can have  
59 unique spatiotemporal distributions (Vergin *et al.*, 2013). However, despite the massive  
60 population size and an estimated divergence time from other *Alphaproteobacteria*  
61 roughly 1.1 billion years ago (Luo *et al.*, 2013), only one subclade (LD12/subclade IIIb)

62 has evolved to colonize freshwater environments (Logares *et al.*, 2009). Subclade IIIb  
63 was first identified in an Arctic lake (LD12, Zwart *et al.*, 1998) and, like its marine  
64 counterparts, can comprise up to 21% of freshwater bacterioplankton (Salcher *et al.*,  
65 2011).

66 Our existing knowledge regarding the underlying genomic basis for the SAR11  
67 shift to freshwater ecosystems comes from culture independent methods:  
68 metagenomics (Dupont *et al.*, 2014) and single-cell genomics (Zaremba-Niedzwiedzka  
69 *et al.*, 2013; Eiler *et al.*, 2015). These data point to changes with important cellular  
70 energetics implications, such as acquisition of the Embden-Meyerhof-Parnas glycolysis  
71 pathway, loss of the glyoxylate shunt and C1 metabolism, and a general trend towards  
72 de novo synthesis, rather than uptake, of many important amino acids, osmolytes and  
73 other compounds. While we have learned much from these efforts, the lack of cultivated  
74 representatives hampers further testing of hypotheses regarding freshwater SAR11  
75 niche differentiation and energetics, as well as the underlying physiology that  
76 fundamentally restricts their distribution.

77 Here we report the first successful isolation and propagation of an  
78 LD12/subclade IIIb representative, strain LSUCC0530. Comparisons with a  
79 representative of the sister subclade IIIa, strain LSUCC0261, isolated from a nearby site  
80 in the Gulf of Mexico (GOM), revealed important differences in salinity tolerances and  
81 ecological distribution across varied environments.

## 82 **Results and Discussion**

83 Phylogenetic inference of strain LSUCC0530 placed it in the Family  
84 *Pelagibacteriales*, subclade IIIb, along with the LD12 clone (Fig. 1A). Cells of strain

85 LSUCC0530 were curved rods,  $< 1\mu\text{m} \times 0.1\mu\text{m}$  (Fig.S1A-B), that grew to a density of 2  
86  $\times 10^7$  cells  $\text{mL}^{-1}$  at  $24^\circ\text{C}$  in JW5 medium (Table S1) that had a salinity of 1.45 ppt.  
87 Comparatively, cells of strain LSUCC0261, from the sister subclade IIIa (“IIIa”), were  
88 also small curved rods (Fig.S1C), but that grew to a density of  $1 \times 10^6$  cells  $\text{mL}^{-1}$  at  
89  $24^\circ\text{C}$  in JW2 with a salinity of 23.18 ppt (Henson *et al.*, 2016). Notably, both  
90 LSUCC0530 and LSUCC0261 matched the previous description of SAR11 strain  
91 HTCC1062 (subclade Ia) (Rappé *et al.* 2002).

92 Ecological data from various sites around southern and Louisiana indicated that  
93 OTUs representing both taxa occurred in high abundances across varied environments.  
94 At Louisiana estuarine and coastal sites that could be classified as nearly  
95 freshwater/brackish ( $< 6$  ppt), LD12 and IIIa shared high average rank abundances (RA)  
96 of 8.9 and 25.7, respectively (Fig. 1, Table S1). At coastal and estuarine sites with  $> 6$   
97 ppt, LD12 was much less abundant or not present (average RA 348.8 when present),  
98 while IIIa had slightly higher abundances (average RA 42.1) compared to those in fresh  
99 water (Fig. 1, Table S1). LSUCC0530-type organisms dominated the MSR microbiome,  
100 occupying the top 6 OTU ranks in all but two of the samples where it occurred within the  
101 top 15 ranks. On the contrary, we found no OTU representing LSUCC0261 in the MSR  
102 using the criteria of appearing with more than 2 reads in over 20% of the samples.

103 To examine the physiological basis for our ecological observations, we tested the  
104 hypothesis that strains LSUCC0530 and LSUCC0261 would have unique salinity  
105 tolerances and optima for growth. Our experiments showed that the LD12 strain,  
106 LSUCC0530, could not grow at added NaCl of 1% or above, while subclade IIIa strain,  
107 LSUCC0261, grew at a range of salinities from 0-4% NaCl (Fig. 2). LSUCC0530 grew

108 optimally at 0% added NaCl at an average rate of  $\sim 0.04$  divisions  $\text{hr}^{-1}$  and a maximum  
109 cell density of  $2 \times 10^7$  cells  $\text{mL}^{-1}$  (Fig. 2 and S3). We note that salinity ranges between  
110 0-1% added NaCl were not tested so LSUCC0530's true optimum may have been  
111 missed. LSUCC0261 grew optimally at 3% added NaCl with an average rate of  $\sim 0.043$   
112 divisions  $\text{hr}^{-1}$  and a maximum cell density of  $5 \times 10^6$  cells  $\text{mL}^{-1}$  (Fig. 2 and S4).  
113 Comparatively, at 0% salinity LSUCC0261 had a growth rate of  $\sim 0.014$  divisions  $\text{hr}^{-1}$   
114 (Fig. 2), roughly 3x lower than LSUCC0530.

115         While our physiological results clearly show unique growth relationships with  
116 salinity for each strain, these data do not completely explain their ecological distribution.  
117 Inland sites appear to be dominated by LD12 taxa, but coastal sites with a dynamic  
118 interface of marine, brackish, and fresh waters do not show complete competitive  
119 exclusion (Fig. 1). The ability of LSUCC0261 to grow in 0% added NaCl suggests that  
120 salinity alone does not prevent colonization of freshwater environments by subclade IIIa  
121 taxa. Concordantly, while rank abundance had a nearly linear correlation with salinity for  
122 LD12 organisms ( $R^2 = 0.73$ ), consistent with its lack of growth in 1% or greater NaCl, we  
123 observed no pattern between subclade IIIa OTU abundances and salinity (Fig. S2).  
124 Furthermore, attempts to grow LSUCC0261 in JW5 medium failed (data not shown),  
125 even though it could grow in JW2 modified to a similar salinity (Table S1). This narrows  
126 the list of additional limiting factors. The two media contained identical carbon, nitrogen,  
127 iron, vitamin, and trace metal constituents (Table S1). Though phosphate was lower in  
128 JW5, it remained greater than environmental concentrations measured throughout the  
129 coastal GOM (Henson *et al.*, 2016). Therefore, the nutrient that prevented LSUCC0261  
130 growth in JW5, and potentially plays a role its distribution in aquatic systems, likely was

131 one or some combination of boron, bromine, strontium, calcium, magnesium, fluorine, or  
132 sulfur (as sulfate), many of which could serve as metabolic co-factors (Table S1). Future  
133 work will examine this hypothesis.

134

## 135 **Conclusions**

136 The first cultured representative of freshwater SAR11, strain LSUCC0530, has  
137 facilitated direct testing of the importance of salinity in differentiating the LD12 subclade  
138 from its sister group subclade IIIb. Ecological data indicates partial overlap in habitat  
139 and suggests that the mechanisms underlying niche differentiation between these sister  
140 clades may constitute complex traits not solely related to salinity tolerance. Future  
141 research should more deeply examine the role cellular energetics (as proposed by  
142 (Dupont, 2014; Eiler, 2016)) plays in their relative success across these dynamic  
143 coastal environments.

144 For the first cultured representative of the LD12 clade, we propose the provisional  
145 taxonomic assignment for strain LSUCC0530 as '*Candidatus Fonsibacter ubiqus*',

146 *Fonsibacter* gen. nov.

147 *Fonsibacter ubiqus* sp. nov.

148 Etymology. *fons* (L. noun): fresh water, spring water, -bacter (Gr. Adj.): "rod,  
149 bacterium". *ubiqus* (L. noun): lake. The Genus name refers to the isolation source and  
150 recognized habitat in fresh water, and its shape. The species name refers to the fact  
151 that LD12/subclade IIIb is ubiquitous in freshwater ecosystems.

152

### 153 **Accession numbers deposited in public databases**

154 Newly generated 16S rRNA gene sequence fastq files are available at the NCBI  
155 Sequence Read Archive under the accession numbers: SRR5082252-SRR5082264. All  
156 other accession numbers can be found in their respective publications. The strain  
157 LSUCC0530 16S rRNA gene sequence is available at NCBI under the accession  
158 number: KY290650.

159

### 160 **Author Contributions**

161 MWH conceived and designed the experiments, performed the experiments, analyzed  
162 the data, and wrote the paper. VCL performed the experiments. JCT conceived and  
163 designed the experiments, assisted in analysis, contributed reagents/materials/analysis  
164 tools, and helped write the paper.

165

### 166 **Acknowledgements**

167 This work was supported by the Department of Biological Sciences at Louisiana State  
168 University and the Louisiana Board of Regents (grant LEQSF(2014-17)-RD-A-06).  
169 Portions of this research were conducted with high performance computing resources  
170 provided by Louisiana State University (<http://www.hpc.lsu.edu>).

171

### 172 **Competing Financial Interests**

173 The authors declare there are no competing financial interests.

174

### 175 **References**

176 Dupont CL, Larsson J, Yooseph S, Ininbergs K, Goll J, Asplund-Samuelsson J, *et al.*  
177 (2014). Functional Tradeoffs Underpin Salinity-Driven Divergence in Microbial  
178 Community Composition. *PLoS One* **9**: e89549.

179

180 Eiler A, Hayakawa DH, Church MJ, Karl DM, Rappé MS. (2009). Dynamics of the  
181 SAR11 bacterioplankton lineage in relation to environmental conditions in the  
182 oligotrophic North Pacific subtropical gyre. *Environ Microbiol* **11**: 2291–2300.

183

184 Eiler A, Mondav R, Sinclair L, Fernandez-Vidal L, Scofield D, Scwientek P, *et al.* (2015).  
185 Tuning fresh: radiation through rewiring of central metabolism in streamlined bacteria.  
186 *ISME J* **10**: 1–13.

- 187  
188 Henson, M.W., Pitre, D.M., Weckhorst, J.L., Lanclos, V.C., Webber, A.T. and Thrash,  
189 J.C., 2016. Artificial Seawater Media Facilitate Cultivating Members of the Microbial  
190 Majority from the Gulf of Mexico. *mSphere*, 1(2), pp.e00028-16.  
191  
192 Logares R, Bråte J, Bertilsson S, Clasen JL, Shalchian-Tabrizi K, Rengefors K. (2009).  
193 Infrequent marine-freshwater transitions in the microbial world. *Trends Microbiol* **17**:  
194 414–422.  
195  
196 Lozupone C a, Knight R. (2007). Global patterns in bacterial diversity. *Proc Natl Acad*  
197 *Sci U S A* **104**: 11436–11440.  
198  
199 Luo H, Ros MC, Hughes b AL, Morana c MA. (2013). Evolution of life history strategies  
200 in marine Alphaproteobacteria. *MBio* **4**: 1–8.  
201  
202 Morris RM, Rappé MS, Connon S a, Vergin KL, Siebold W a, Carlson C a, *et al.* (2002).  
203 SAR11 clade dominates ocean surface bacterioplankton communities. *Nature* **420**:  
204 806–810.  
205  
206 Rappé MS, Connon SA, Vergin KL, Giovannoni SJ. (2002). Cultivation of the ubiquitous  
207 SAR11 marine bacterioplankton clade. *Nature* **418**: 630–633.  
208  
209 Salcher MM, Pernthaler J, Posch T. (2011). Seasonal bloom dynamics and  
210 ecophysiology of the freshwater sister clade of SAR11 bacteria ‘that rule the  
211 waves’(LD12). *ISME J* **5**: 1242–1252.  
212  
213 Vergin KL, Beszteri B, Monier A, Thrash JC, Temperton B, Treusch AH, *et al.* (2013).  
214 High-resolution SAR11 ecotype dynamics at the Bermuda Atlantic Time-series Study  
215 site by phylogenetic placement of pyrosequences. *ISME J* **7**: 1322–32.  
216  
217 Zaremba-Niedzwiedzka K, Viklund J, Zhao W, Ast J, Sczyrba A, Woyke T, *et al.* (2013).  
218 Single-cell genomics reveal low recombination frequencies in freshwater bacteria of the  
219 SAR11 clade. *Genome Biol* **14**: R130.  
220  
221 Zwart G, Hiorns WD, Methé BA, van Agterveld MP, Huismans R, Nold SC, *et al.* (1998).  
222 Nearly identical 16S rRNA sequences recovered from lakes in North America and  
223 Europe indicate the existence of clades of globally distributed freshwater bacteria. *Syst*  
224 *Appl Microbiol* **21**: 546–556.  
225  
226

## 227 **Figure Legends**

228  
229 **Figure 1.** A) Phylogenetic tree of the SAR11 clade. Nodes highlighted in blue are part of  
230 subclade IIIb, while nodes highlighted in red are part of subclade IIIa. Values at internal  
231 nodes indicate Shimodaira-Hasegawa “like” test values. B) Ecological distribution of  
232 SAR11 LSUCC0530 and LSUCC0261 along the Louisiana coast, along the Mississippi



233 River, and at Lake Martin. LSUCC0530 and LSUCC0261 are blue and red dots,  
234 respectively. Size of the dot corresponds to the log transformed rank abundance, while  
235 shade of the dot represent the measured or inferred salinity.

236

237 **Figure 2.** Growth rate of LSUCC0530 and LSUCC0261 as calculated in the various  
238 Salinities (0, 1, 2, 3, 4, 5% NaCl). LSUCC0530 and LSUCC0261 are blue and red dots,  
239 respectively. Non-linear regressions are provided for guidance.

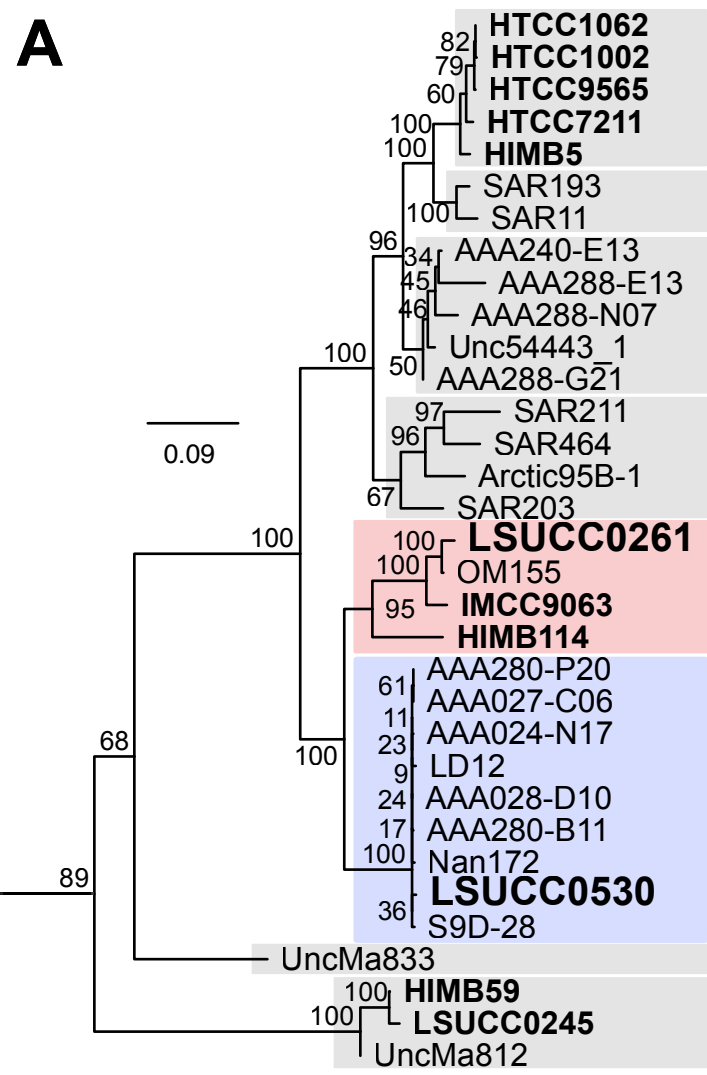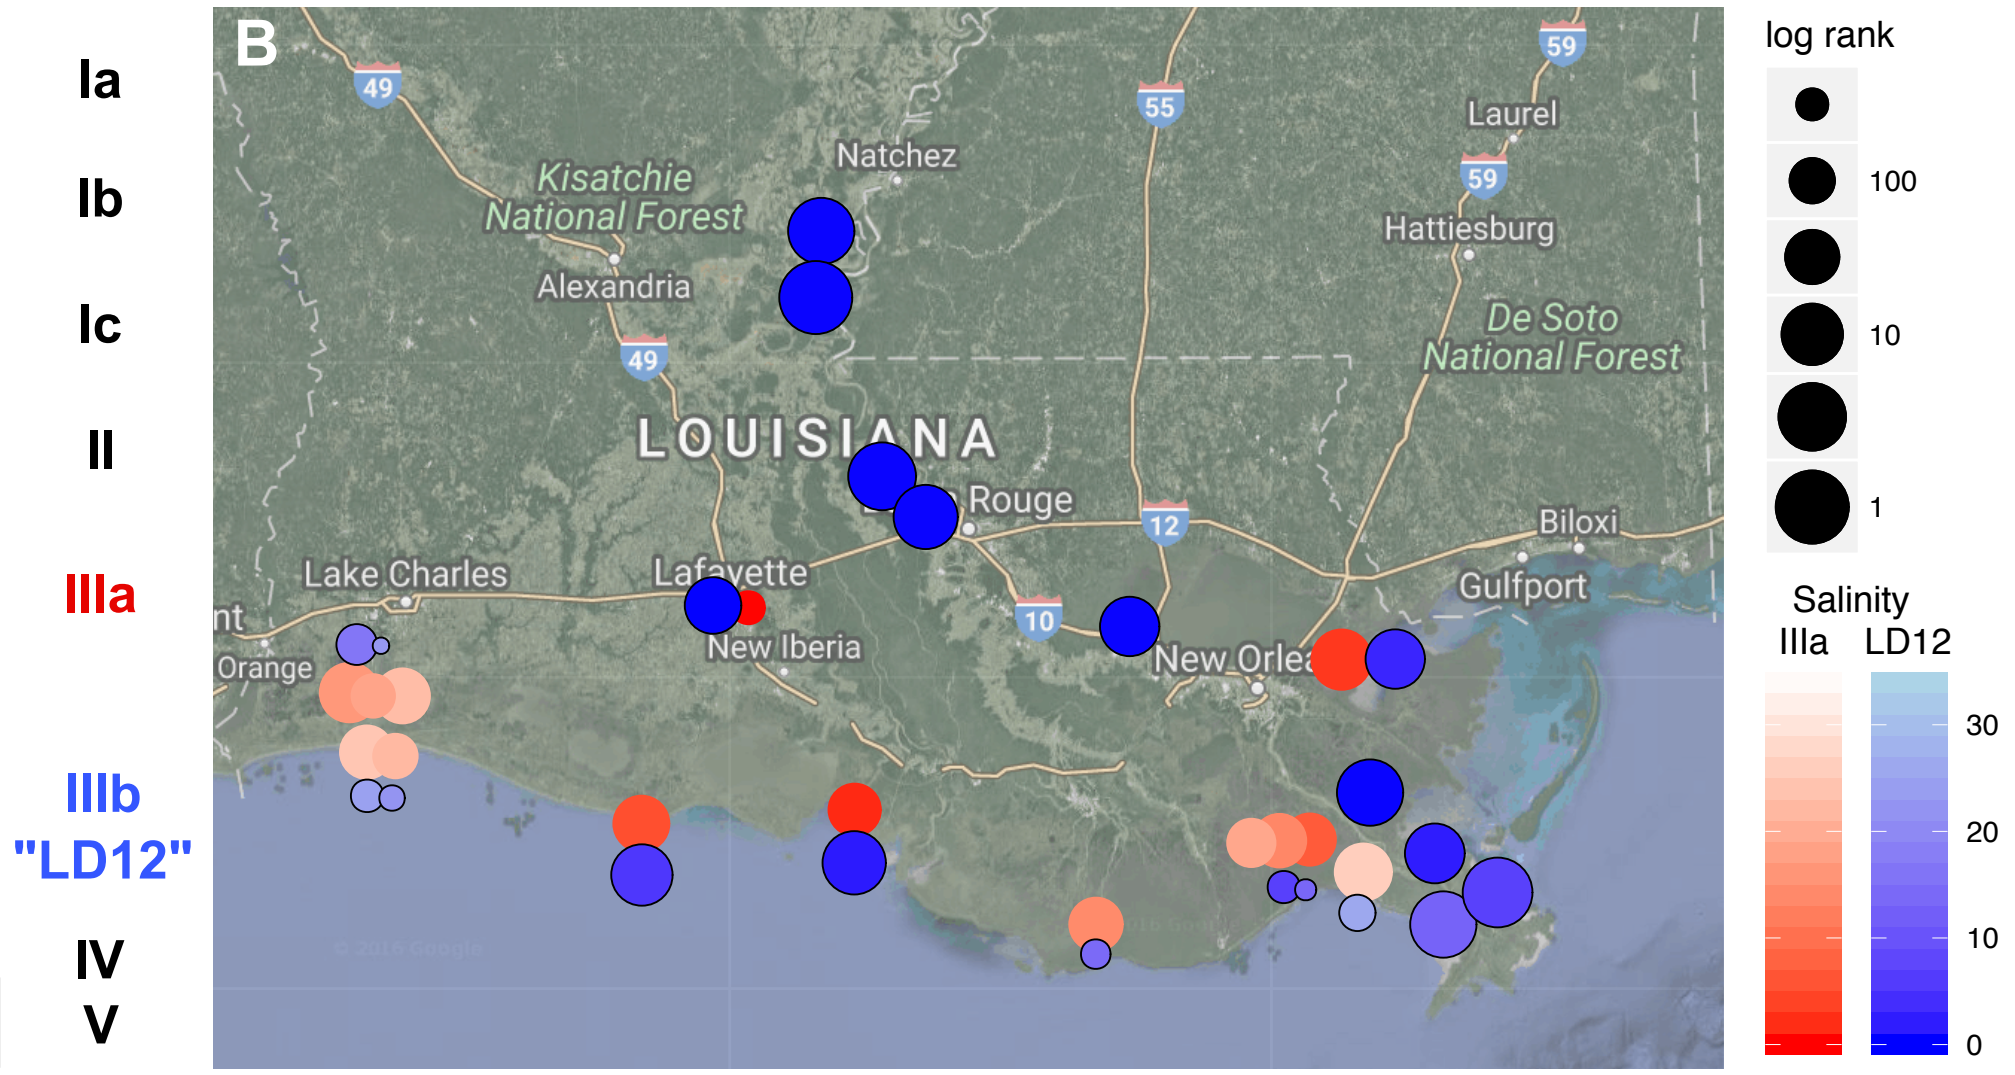

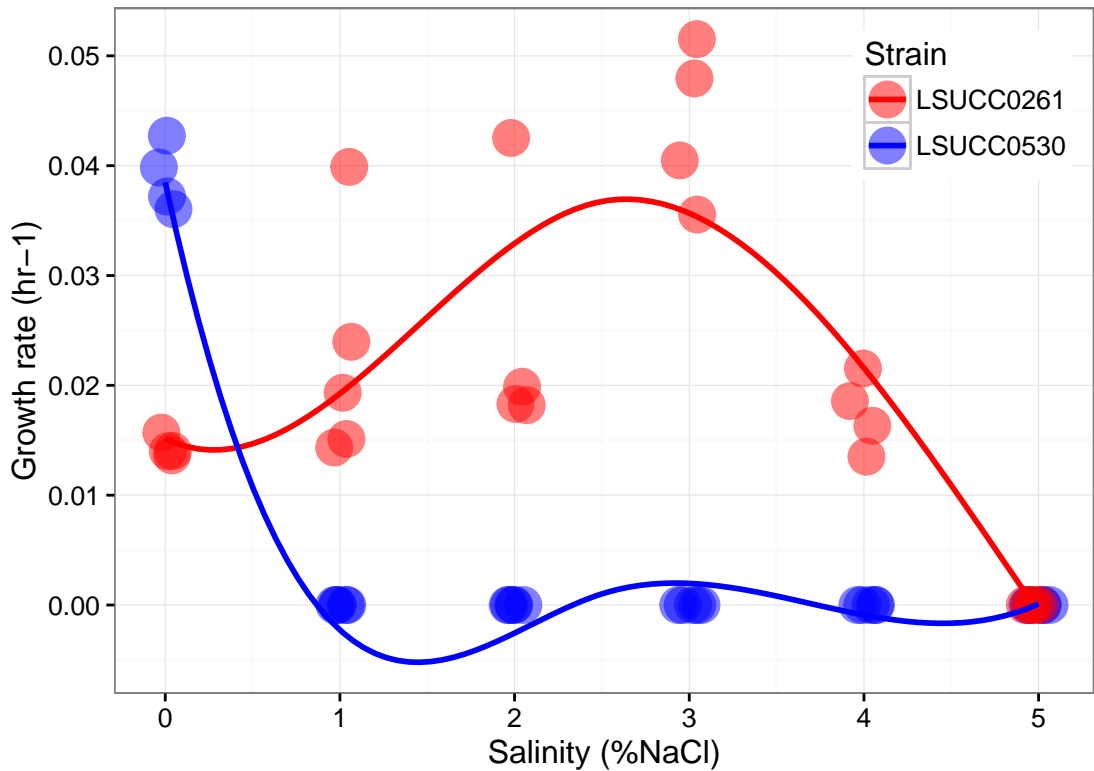

Source: https://www.biorxiv.org/content/biorxiv/early/2016/12/13/093567.full.pdf
